# Supplementary material
Source: Royal Society of Chemistry journal article supplement (doi:10.1039/d6ta01385f)
Supplement: d6ta01385f1.pdf [file d6ta01385f1.pdf]

1 **Supporting Information**

2 **Dual-Salt-Enabled Atomic Engineering of Zn-N<sub>4</sub> Sites through Na/Cl Modulation for High-**  
3 **Performance Bifunctional Oxygen Electrocatalysis**

4 Zhixin Wang<sup>a</sup>, Yingjie Chen<sup>a,\*</sup>, Tengyu Zhang<sup>a</sup>, Fanzhen Kong<sup>a</sup>, Likai Jin<sup>a</sup>, Beili Pang<sup>a</sup>, Qian Zhang<sup>a</sup>,  
5 Jianguang Feng<sup>a,\*</sup>, Liyan Yu<sup>a,\*</sup>, and Lifeng Dong<sup>a,b,\*</sup>

6 <sup>a</sup>College of Materials Science and Engineering, Qingdao University of Science and Technology, Qingdao  
7 266042, China

8 <sup>b</sup>Department of Physics, Hamline University, St. Paul 55104, USA

9

10

11

12

13

14

15

16

17

18

19

20

21

22

23

24

---

25 \*Corresponding authors. E-mail: [donglifeng@qust.edu.cn](mailto:donglifeng@qust.edu.cn), [ldong03@hamline.edu](mailto:ldong03@hamline.edu) (Lifeng Dong),  
26 [liyanyu@qust.edu.cn](mailto:liyanyu@qust.edu.cn) (Liyan Yu), [fengjg@qust.edu.cn](mailto:fengjg@qust.edu.cn) (Jianguang Feng), and [chenyingjie@qust.edu.cn](mailto:chenyingjie@qust.edu.cn)  
27 (Yingjie Chen).

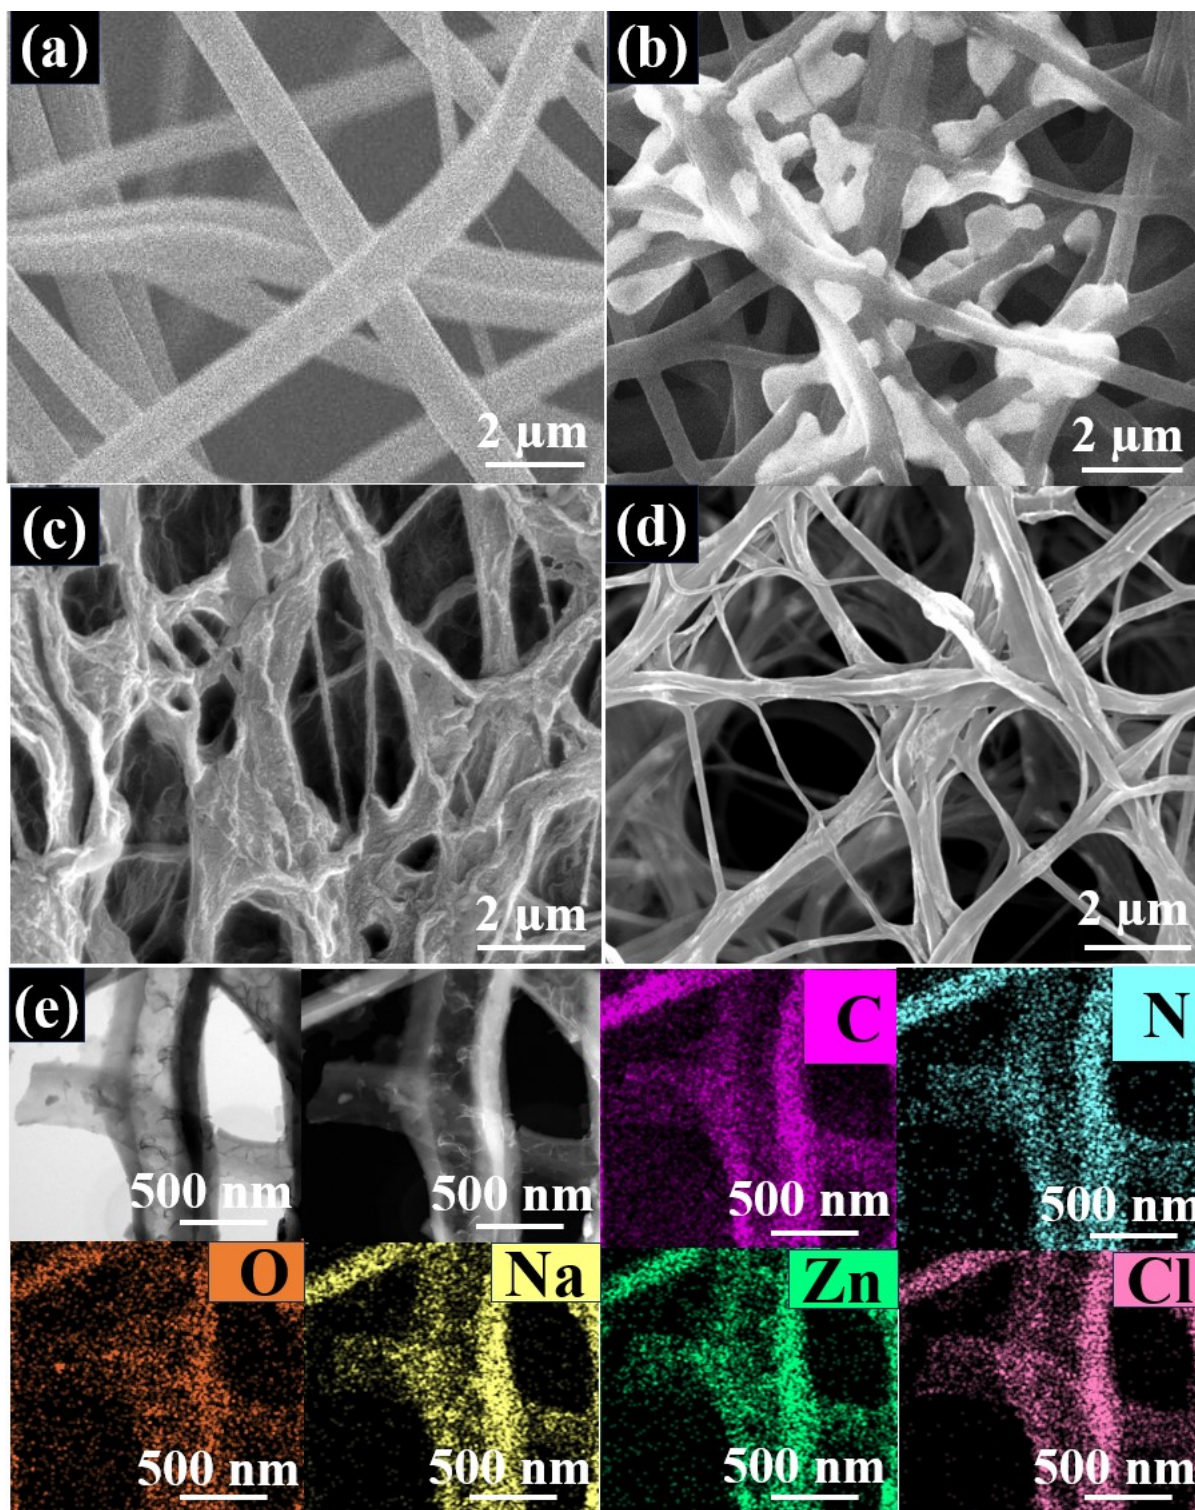

1  
 2 Figure S1. SEM images of (a) Na-Fs, (b) ZnNa-Fs-300, (c) ZnNa-CFs-800, and (d) ZnNa-CFs-  
 3 1000. (e) TEM image of ZnNa-CFs-500 with the corresponding EDS elemental mapping results.  
 4

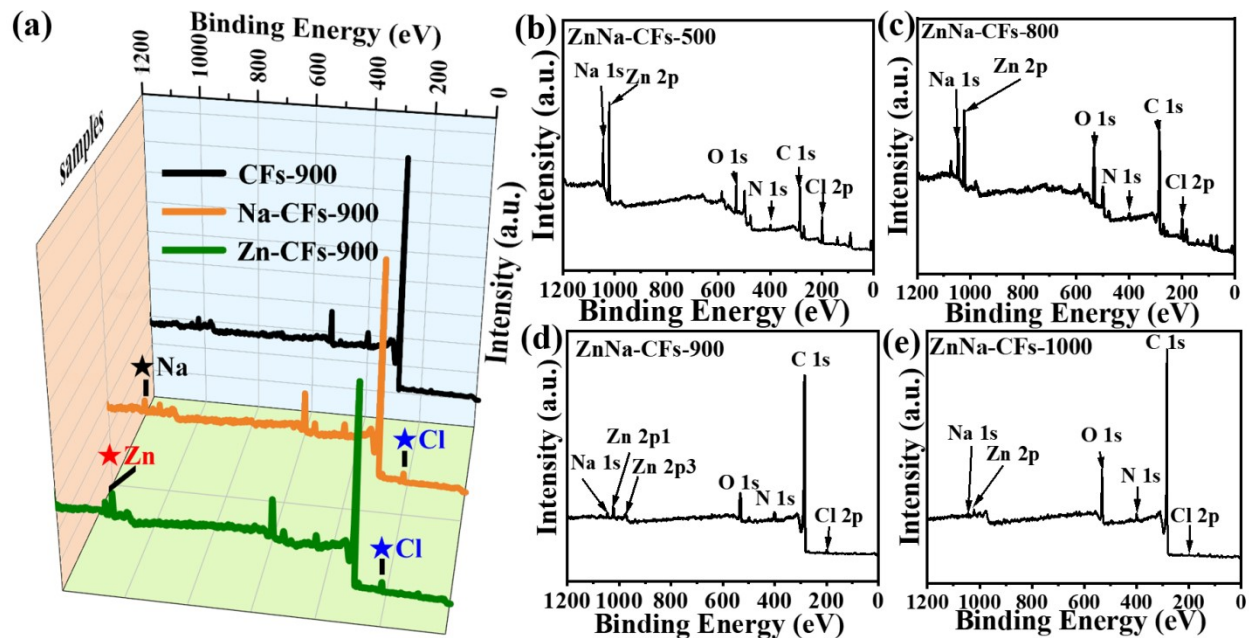

1

2 Figure S2. (a) Comparative XPS survey spectra of CFs-900, Na-CFs-900, and Zn-CFs-900 presented in a  
 3 three-dimensional stacked view. XPS survey spectra of (b) ZnNa-CFs-500, (c) ZnNa-CFs-800, (d) ZnNa-  
 4 CFs-900, and (e) ZnNa-CFs-1000.

5

6

7

8

9

10

11

12

13

14

Table S1. EXAFS fitting parameters at the Zn K-edge for the various samples.

| Sample   | Path   | N           | R (Å)        | $\sigma^2$ ( $\times 10^{-3}$ Å <sup>2</sup> ) | $E_0$ (eV)  | R-factor |
|----------|--------|-------------|--------------|------------------------------------------------|-------------|----------|
| Zn Foil  | Zn-Zn1 | 6           | 2.64 (0.004) | 11.33 (1.38)                                   | 2.34 (1.45) | 0.005    |
|          | Zn-Zn2 | 6           | 2.80 (0.02)  | 2.54 (5,32)                                    |             |          |
| ZnNa-CFs | Zn-N   | 1.29 (0.21) | 2.03 (0.02)  | 3.16                                           | 7.04 (1.04) | 0.015    |
|          | Zn-Cl  | 2.41 (0.17) | 2.27 (0.01)  | 3.87                                           |             |          |
| Zn-CFs   | Zn-N   | 2.09 (0.14) | 1.97 (0.02)  | 4.53                                           | 4.47 (1.33) | 0.011    |
|          | Zn-Cl  | 0.88 (0.11) | 2.25 (0.01)  | 0.40                                           |             |          |

1 <sup>a</sup>CN, coordination number; <sup>b</sup>R, distance between absorber and backscattering atoms; <sup>c</sup> $\sigma^2$ , Debye-Waller  
2 factor accounting for thermal and structural disorders; <sup>d</sup> $\Delta E_0$ , inner-potential correction; The R factor  
3 indicates the goodness of fit. The amplitude reduction factor ( $S_0^2$ ) was fixed at 0.90 based on the  
4 experimental EXAFS fitting of Zn foil with the CN constrained to its known crystallographic value.  
5 Reasonable ranges for EXAFS fitting parameters are:  $0.600 < S_0^2 < 1.000$ ;  $CN > 0$ ;  $\sigma^2 > 0$  Å<sup>2</sup>;  $|\Delta E_0| < 15$   
6 eV; R factor < 0.02.

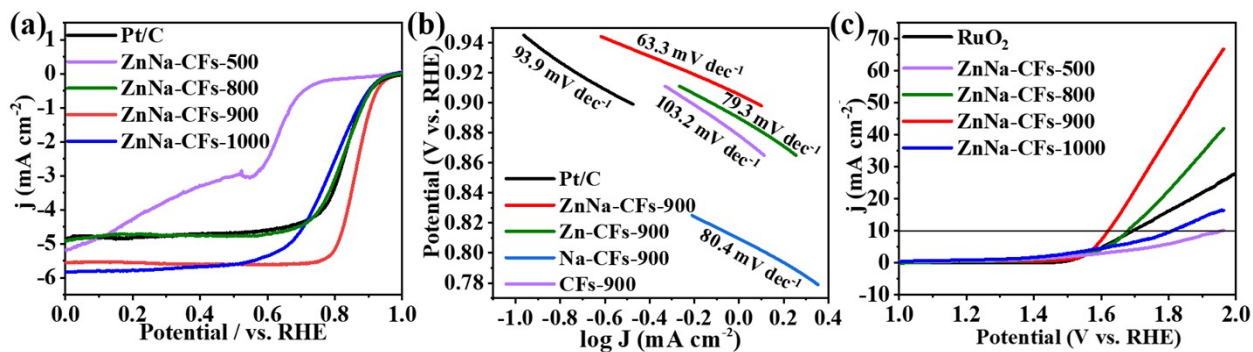

7  
8 Figure S3. (a) ORR polarization curves of various CFs compared with Pt/C. (b) Tafel slopes of the CF  
9 samples for ORR. (c) OER polarization curves of various CFs compared with RuO<sub>2</sub>.

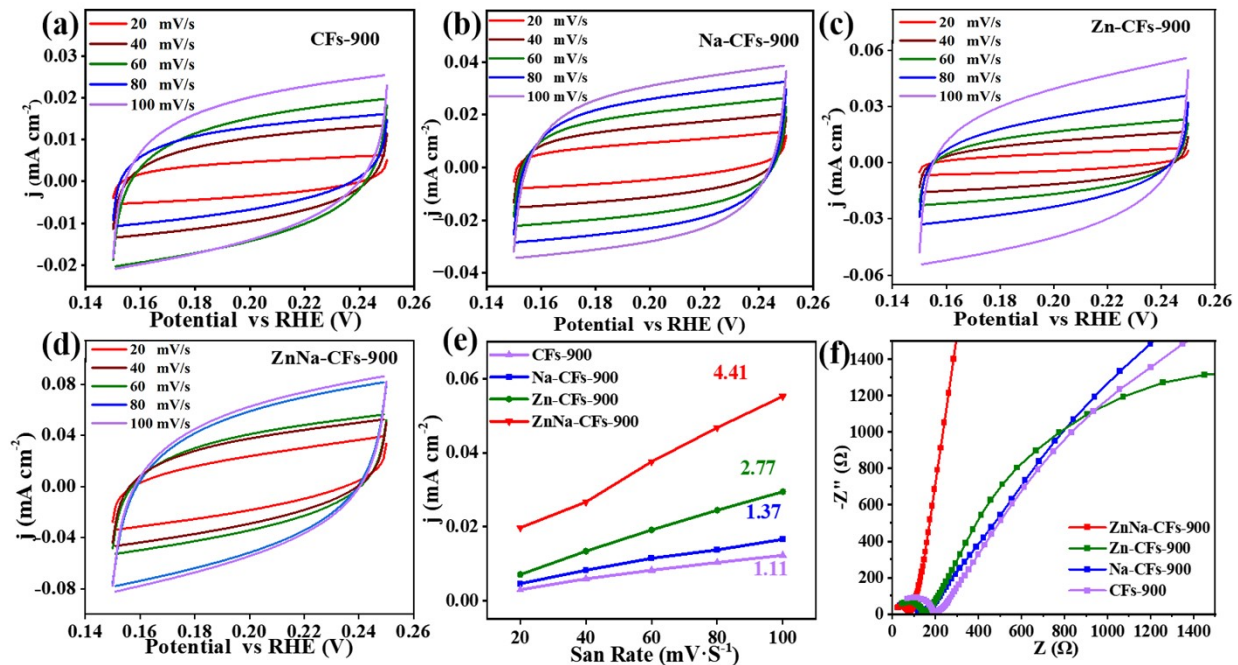

1

2 Figure S4. CV curves of (a) CFs-900, (b) Na-CFs-900, (c) Zn-CFs-900, and (d) ZnNa-CFs-900 recorded

3 at sweep rates of 20-100 mV/s. (e) Current density versus sweep rate and (f) Nyquist plots for the four

4

samples.

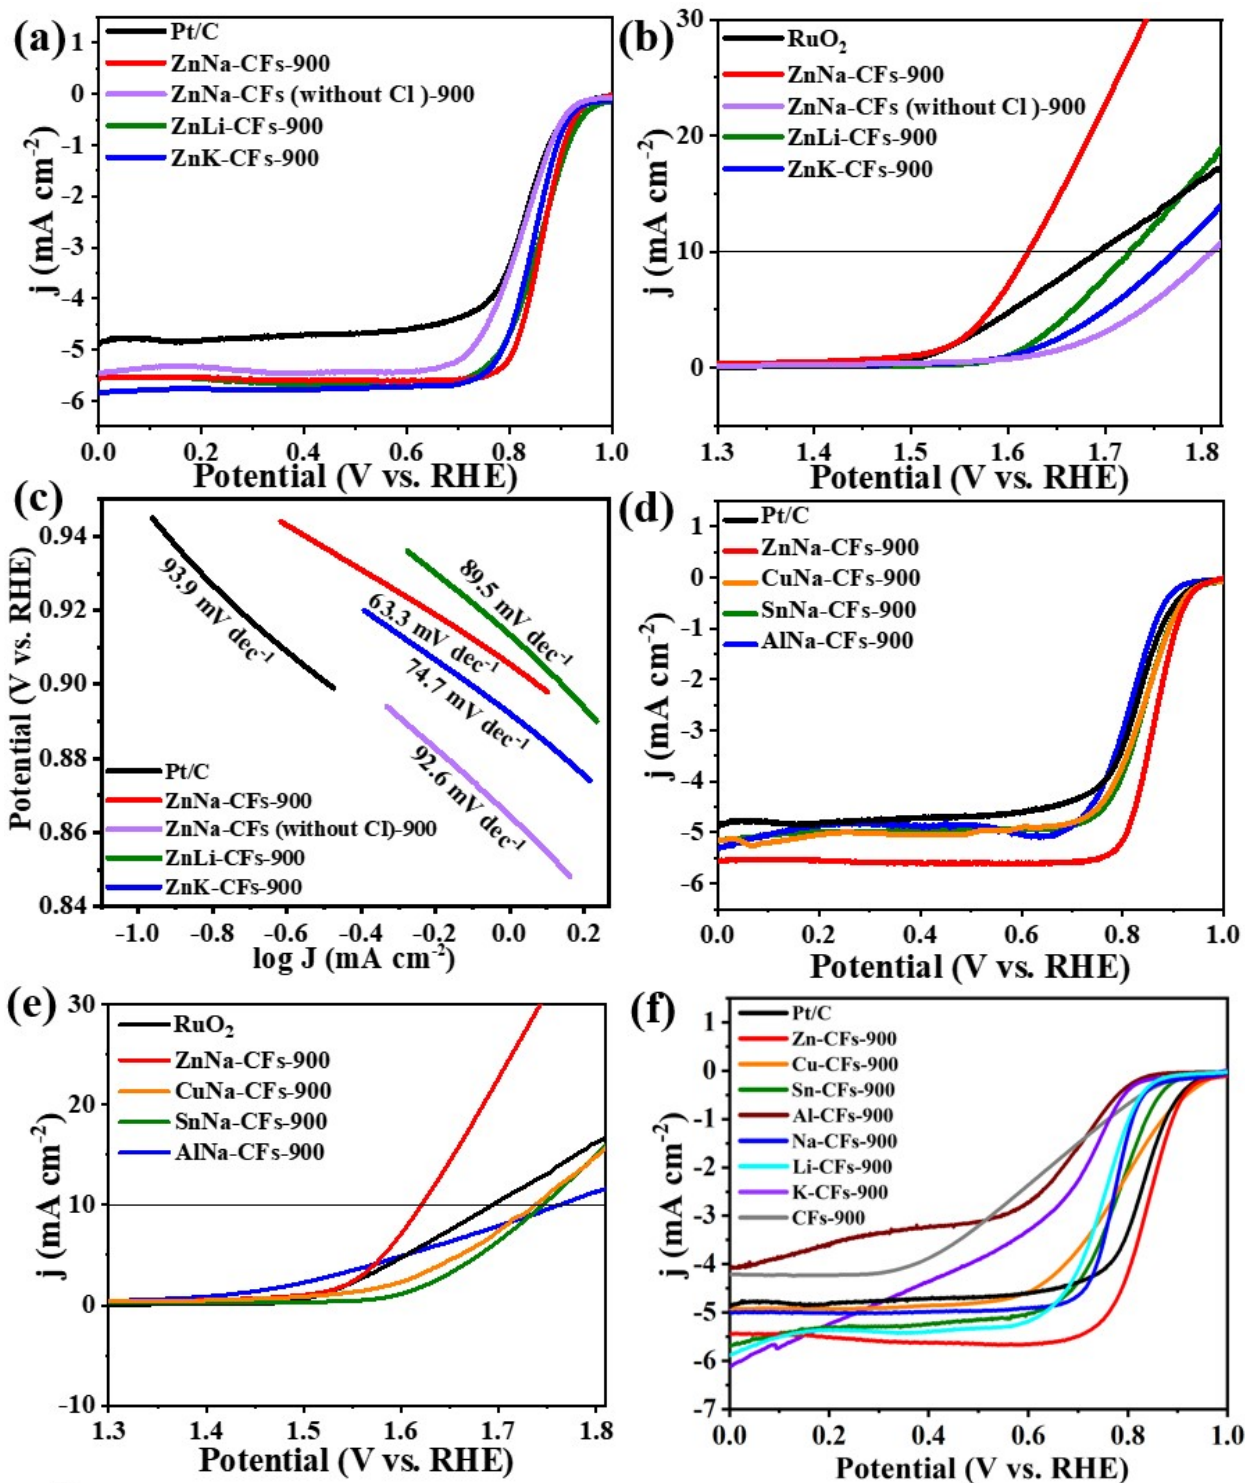

1

2 Figure S5. (a) ORR and (b) OER polarization curves of the Zn-based catalysts. (c) Tafel slopes for ORR.

3 (d) ORR and (e) OER polarization curves of the Na-regulated catalysts. (f) ORR polarization curves.

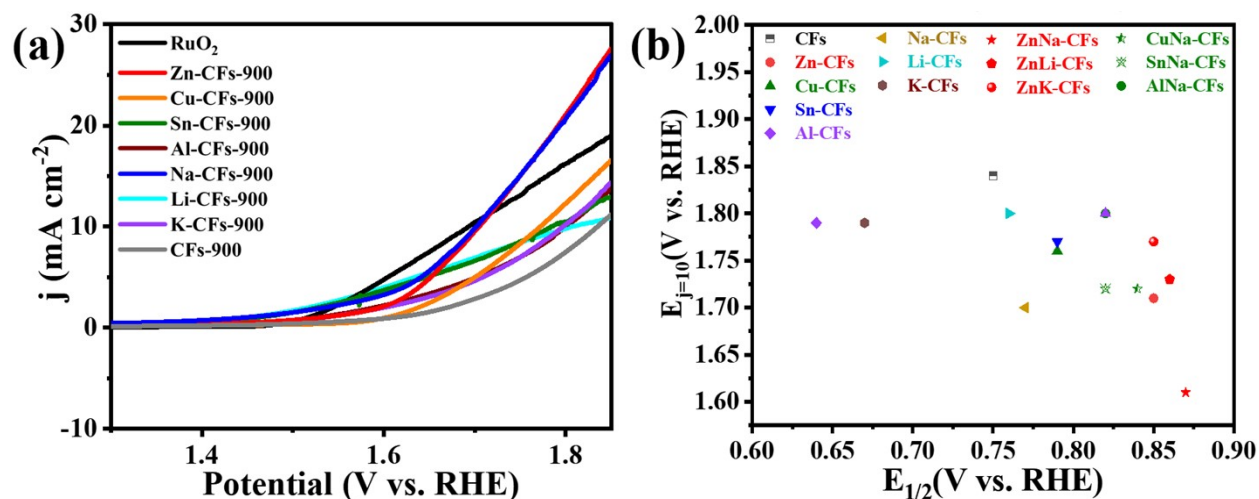

1  
2 Figure S6. (a) OER polarization curves. (b) Summary plot comparing the ORR and OER activities of all  
3 samples.

4 Table S2. Comparison of ORR and OER activities of ZnNa-CFs-900 with other recently reported noble  
5 metal-free catalysts<sup>[1-6]</sup>.

| Catalysts                            | $E_{\text{onset}}$<br>(V vs. RHE) | $E_{1/2}$<br>(V vs. RHE) | $J_1$<br>(mA cm <sup>-2</sup> ) | $E_{j=10}$<br>(V vs. RHE) | References |
|--------------------------------------|-----------------------------------|--------------------------|---------------------------------|---------------------------|------------|
| Co <sub>4</sub> /Fe <sub>1</sub> @NC | 0.980                             | 0.835                    | 4.55                            | /                         | [1]        |
| NZP-900                              | 0.96                              | 0.79                     | 3.23                            | /                         | [2]        |
| FeCoNi-N-rGO                         | 0.89                              | 0.836                    | 5.11                            | 1.67                      | [3]        |
| Mn/Co-N-C-0.02-800                   | 0.9                               | 0.8                      | 5.3                             | 1.66                      | [4]        |
| H-CoFe@NCNF                          | 0.96                              | 0.77                     | 4.89                            | 1.68                      | [5]        |
| CoN-HPCNF                            |                                   | 0.78                     | 5.0                             | 1.63                      | [6]        |
| ZnNa-CFs-900                         | 0.95                              | 0.87                     | 5.6                             | 1.61                      | This work  |

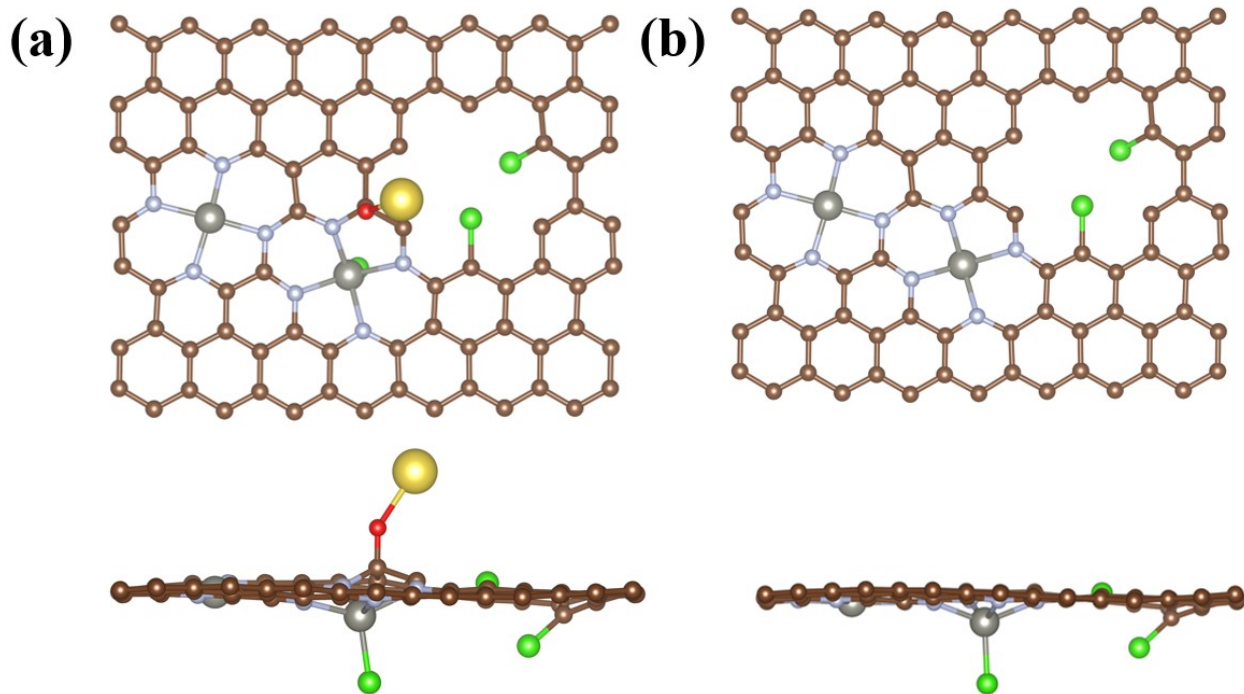

1  
2 Figure S7. Molecular models of representative catalyst slabs and the corresponding adsorption  
3 configurations of oxygen intermediates (a) ZnNa-CFs, (b) Zn-CFs-900.

4  
5 Table S3. Bader effective charges of two catalyst slabs

|          | Na     | Cl(Zn-Cl) | Cl(C-Cl)-1 | Cl(C-Cl)-2 |
|----------|--------|-----------|------------|------------|
| ZnNa-CFs | -0.144 | -0.741    | 0.004      | -0.187     |
| Zn-CFs   | /      | -0.708    | 0.037      | -0.193     |

6  
7  
8  
9

## 1 References

- 2 [1] A. Han, W. Sun, X. Wan, D. Cai, X. Wang, F. Li, J. Shui, D. Wan, Construction of Co<sub>4</sub> atomic clusters  
3 to enable Fe-N<sub>4</sub> motifs with highly active and durable oxygen reduction performance, *Angew. Chem.*  
4 *Int. Ed.* 62 (2023) e202303185. <https://doi.org/10.1002/anie.202303185>
- 5 [2] S. Ran, J. Qi, X. Dong, H. Huang, M. Qi, W. Dong, P. Zhao, Z. Zhao, J. Yang, Molten NaCl-assisted  
6 pyrolysis of ZIF-8/PAN electrospun fibers to synthesize 1D cross-linked mesoporous N-rich carbon  
7 as oxygen reduction electrocatalysts, *Chem. Eng. J.* 463 (2023) 142174.  
8 <https://doi.org/10.1016/j.cej.2023.142174>.
- 9 [3] X. Chen, D. Chen, G. Li, C. Gong, Y. Chen, Q. Zhang, J. Sui, H. Dong, J. Yu, L. Yu, L. Dong, A  
10 hierarchical architecture of Fe/Co/Ni-doped carbon nanotubes/nanospheres grafted on graphene as  
11 advanced bifunctional electrocatalyst for Zn-air batteries, *J. Alloys Compd.* 873 (2021) 159833.  
12 <https://doi.org/10.1016/j.jallcom.2021.159833>.
- 13 [4] L. Wei, L. Qiu, Y. Liu, J. Zhang, D. Yuan, L. Wang, Mn-doped Co-N-C dodecahedron as a  
14 bifunctional electrocatalyst for highly efficient Zn-air batteries, *ACS Sustain. Chem. Eng.* 7 (2019)  
15 14180-14188. <https://doi.org/10.1021/acssuschemeng.9b02884>.
- 16 [5] X. Zhang, P. Yu, G. Xing, Y. Xie, X. Zhang, G. Zhang, F. Sun, L. Wang, Iron single atoms-assisted  
17 cobalt nitride nanoparticles to strengthen the cycle life of rechargeable Zn-air battery, *Small* 18 (2022)  
18 2205228. <https://doi.org/10.1002/sml.202205228>.
- 19 [6] W. Peng, X. Yang, L. Mao, J. Jin, S. Yang, J. Zhang, G. Li, ZIF-67-derived Co nanoparticles anchored  
20 in N-doped hollow carbon nanofibers as bifunctional oxygen electrocatalysts, *Chem. Eng. J.* 407  
21 (2021) 127157. <https://doi.org/10.1016/j.cej.2020.127157>.

22
